# Supplementary material
Source: HighWire-hosted journal article supplement (https://bmjopen.bmj.com/content/14/8/e084889)
Supplement: inline-supplementary-material-1 [file inline-supplementary-material-1.pdf]

Additional file 1: Characteristics of reviews

| Author                         | Review design                       | Focus area of review   | Populations                    | No. of included studies | No. of participants | Search period covered                | Countries where trials were conducted (n*)                                                                                    |
|--------------------------------|-------------------------------------|------------------------|--------------------------------|-------------------------|---------------------|--------------------------------------|-------------------------------------------------------------------------------------------------------------------------------|
| Charrow (2017) <sup>9</sup>    | Systematic review                   | Reporting              | Dermatologic conditions        | 626                     | Not specified       | 2010-2015                            | US (164); non-US (462)                                                                                                        |
| Glover (2015) <sup>25</sup>    | Systematic review                   | Recruitment            | Indigenous people              | 53                      | Not provided        | Papers published prior to March 2012 | USA (35)<br>NZ (8)<br>Australia (6)<br>Canada (4)                                                                             |
| Orkin (2021) <sup>26</sup>     | Systematic review                   | Reporting              | General                        | 237                     | Not provided        | 2014-2020                            | Not specified                                                                                                                 |
| Acton (2022) <sup>77</sup>     | Systematic review and meta-analysis | Reporting              | Acute ischemic stroke          | 12                      | 7,955               | 2010-2020                            | US and Canada                                                                                                                 |
| Paul (2021) <sup>27</sup>      | Systematic review                   | Reporting and analysis | Orthopaedics                   | 482                     | Not specified       | 2015 - 2019                          | US (482)                                                                                                                      |
| Canevelli (2019) <sup>28</sup> | Systematic review                   | Reporting and analysis | Alzheimer’s disease            | 49                      | 21,000              | 1996-2018                            | Multi-sites                                                                                                                   |
| Cwalina (2022) <sup>29</sup>   | Systematic review                   | Reporting              | Orthopaedic                    | 1,043                   | 184,643             | 2000-2020                            | United States (361), North America (88), Europe (388), Asia (136), Australia or New Zealand (53), Africa (4), Middle East (8) |
| Kotlier (2024) <sup>30</sup>   | Systematic review                   | Reporting              | Femoral acetabular impingement | 48                      | Not provided        | 2011-2023                            | Not provided                                                                                                                  |
| Pathiyil (2023) <sup>31</sup>  | Systematic review                   | Reporting              | Inflammatory bowel disease     | 627                     | 108986              | 1995-2023                            | Cross-continental (189)<br>Europe (431)<br>North America (239)                                                                |

|                                  |                                        |             |                                                                       |     |              |            |                                                                                                                   |
|----------------------------------|----------------------------------------|-------------|-----------------------------------------------------------------------|-----|--------------|------------|-------------------------------------------------------------------------------------------------------------------|
|                                  |                                        |             |                                                                       |     |              |            | Asia (207)<br>Oceania (73)<br>Africa (56)<br>South America (35)                                                   |
| Patki (2023)<br><sup>32</sup>    | Systematic review                      | Reporting   | Prostate cancer                                                       | 54  | 19 039       | 2010-2020  | USA (36)<br>Multinational (43)<br>UK (8)<br>Canada (8)<br>Netherlands (6)<br>Japan (5)<br>France (4)<br>Italy (4) |
| Xiao (2024)<br><sup>78</sup>     | Systematic review<br>and Meta-analysis | Reporting   | COVID-19 trials                                                       | 122 | 176 654      | 2019-2022  | US (122)                                                                                                          |
| Tseng (2021)<br><sup>33</sup>    | Systematic Review                      | Recruitment | Couple and family<br>therapy intervention                             | 196 | Not provided | 2014-2019  | USA (196)                                                                                                         |
| Riccioni<br>(2023) <sup>79</sup> | Systematic review<br>and meta-analysis | Reporting   | Attention-<br>deficit/hyperactivity<br>disorder (ADHD)<br>medications | 310 | 44,447       | 2014-20223 | US (215)<br>Europe (37)<br>Asia (21)<br>Other (24)                                                                |
| Kou (2024)<br><sup>34</sup>      | Systematic review                      | Reporting   | COVID-19 vaccine<br>trials                                            | 144 | 88,772,      | 2020-2023  | Americas (27)<br>Europe (31)<br>South-East Asia (17)<br>Western Pacific (43)<br>Africa (3)<br>Multiple (18)       |
| Talaski<br>(2024) <sup>35</sup>  | Systematic review                      | Reporting   | Achilles tendon<br>pathology                                          | 68  | Not provided | 1999-2023  | US (6)<br>Outside US (61)<br>Unknown (1)                                                                          |
| Alvarez<br>(2024) <sup>80</sup>  | Systematic review<br>and meta-analysis | Reporting   | Plastic and<br>reconstructive<br>surgery                              | 36  | 7281         | 2012-2022  | US (36)                                                                                                           |

|                                |                   |                           |                                                                             |     |                                                                    |                     |                                                             |
|--------------------------------|-------------------|---------------------------|-----------------------------------------------------------------------------|-----|--------------------------------------------------------------------|---------------------|-------------------------------------------------------------|
| Sayyid (2021) <sup>36</sup>    | Systematic review | Reporting                 | Minimally invasive surgical techniques                                      | 496 | Not specified for full sample; 17 trials with racial data (12,543) | Up to December 2017 | USA, UK, Canada, Brazil, Australia.                         |
| Tahhan (2020) <sup>37</sup>    | Systematic review | Recruitment               | Acute coronary syndrome                                                     | 460 | 1,067,520                                                          | 2001-2018           | USA<br>Western Europe<br>Rest of the world<br>Multiregional |
| Mendoza (2012) <sup>38</sup>   | Systematic review | Recruitment; Reporting    | Panic disorder                                                              | 47  | 2,687                                                              | 1993-2010           | US and the Canada (18),<br>US (1)                           |
| Nicholson (2015) <sup>39</sup> | Systematic review | Recruitment and retention | Low-income and minority populations                                         | 165 | Not provided                                                       | 2004-2014           | USA (165)                                                   |
| Carroll (2011) <sup>40</sup>   | Systematic review | Recruitment and retention | Physical activity interventions in primary care and community settings      | 38  | 8,790                                                              | 1998-2010           | US (38)                                                     |
| Ibrahim (2013) <sup>41</sup>   | Systematic review | Recruitment               | Minority persons                                                            | 26  | Not provided                                                       | 1995-2012           | USA (23)<br>Australia (2)<br>Canada (1)                     |
| Haughton (2018) <sup>42</sup>  | systematic review | Recruitment; Reporting    | Lifestyle weight loss intervention interventions                            | 94  | 29,320                                                             | 2009-2015           | USA (94)                                                    |
| Heller (2014) <sup>43</sup>    | Systematic review | Recruitment               | General                                                                     | 21  | Not provided                                                       | 2001-2013           | USA (21)                                                    |
| Masood (2019) <sup>44</sup>    | Systematic review | Recruitment               | Physical illness (diabetes and ischemic heart disease) and mental disorders | 21  | 8,687                                                              | Up to 2018          | UK (21)                                                     |

|                                  |                                     |                                     |                                             |     |                                    |               |                                                                                                                                                 |
|----------------------------------|-------------------------------------|-------------------------------------|---------------------------------------------|-----|------------------------------------|---------------|-------------------------------------------------------------------------------------------------------------------------------------------------|
| Cui (2015) <sup>45</sup>         | Systematic review                   | Recruitment and retention           | Obesity prevention and treatment - children | 43  | Not provided                       | Not provided  | not provided                                                                                                                                    |
| Burnette (2022) <sup>46</sup>    | Systematic review                   | Recruitment reporting               | Eating disorder psychotherapy treatment     | 58  | 4,864                              | 1985-2020     | USA (58)                                                                                                                                        |
| Long (2024) <sup>81</sup>        | Systematic review and meta-analysis | Recruitment, reporting and analysis | peripheral artery disease                   | 59  | 8302                               | 2012-2022     | Germany (12)<br>US (11)<br>China (7)<br>Other (24)                                                                                              |
| Rosenbaum <sup>47</sup>          | Systematic review                   | Recruitment                         | Behavioural weight loss (BWL) treatment,    | 71  | Not provided                       | Not specified | US                                                                                                                                              |
| Somerson (2014) <sup>48</sup>    | Systematic review                   | Reporting                           | Orthopaedic                                 | 158 | 37,625                             | 2008-2011     | USA (158)                                                                                                                                       |
| Kwiatkowski (2013) <sup>49</sup> | Systematic review                   | Reporting                           | Cancer                                      | 277 | 329,671                            | 2001 - 2010   | US (277)                                                                                                                                        |
| Schick (2020) <sup>50</sup>      | Systematic review                   | Reporting and analysis              | Pharmacological treatments                  | 102 | Not provided                       | 1994-2019     | USA (54)                                                                                                                                        |
| Chen (2022) <sup>51</sup>        | Systematic review                   | Reporting                           | Dermatologic conditions                     | 392 | Not provided                       | 2015-2020     | US (100); non-US (292)                                                                                                                          |
| Begic (2019) <sup>52</sup>       | Systematic review                   | Reporting and analysis              | Anesthesiology trials                       | 732 | Not specified                      | 2014-2017     | USA (169); Canada (52); Denmark (49); UK (38); Korea (37); China (37); Germany (36); France (36); Australia (25); Netherlands (25); Other (228) |
| Hirano (2021) <sup>53</sup>      | Systematic review                   | Reporting and analysis              | Atopic dermatitis                           | 78  | Average number of participants 203 | 2000-2009     | US (78)                                                                                                                                         |
| Riaz (2023) <sup>85</sup>        | Meta-analysis                       | Reporting and analysis              | Prostate cancer                             | 286 | 104 205                            | 1989- 2020    | US (65)<br>Outside US (115)                                                                                                                     |

|                              |                                     |                        |                                    |     |               |               |                                                                                                                                                                    |
|------------------------------|-------------------------------------|------------------------|------------------------------------|-----|---------------|---------------|--------------------------------------------------------------------------------------------------------------------------------------------------------------------|
|                              |                                     |                        |                                    |     |               |               | International with US participants (62)<br>Region unspecified (44)                                                                                                 |
| Griffin (2021) <sup>54</sup> | Systematic review                   | Reporting              | Not specified                      | 209 | Not specified | 2015-2019     | USA (77)<br>China (25)<br>Other (25)<br>Australia (17)<br>South Korea (15)<br>Japan (15)<br>Netherlands (8)<br>Canada (4)<br>UK (8)<br>Thailand (6)<br>Denmark (4) |
| Isaacs (2016) <sup>55</sup>  | Systematic review                   | Reporting              | Type 2 diabetes                    | 79  | 12,916        | 2000-2015     | United States (59),<br>Australia (7), Canada (7),<br>the United Kingdom (5),<br>both the United States and<br>Canada (1).                                          |
| Kong (2021) <sup>56</sup>    | Systematic review                   | Reporting              | Epilepsy                           | 230 | 39,576        | 1988 - 2019.  | Not specified                                                                                                                                                      |
| Zhang (2013) <sup>57</sup>   | Systematic review                   | Recruitment            | Cardiovascular diseases            | 250 | 1,103,694     | 1997-2010     | USA (250)                                                                                                                                                          |
| Vyas (2018) <sup>82</sup>    | Systematic review and meta-analysis | Recruitment            | Dementia                           | 96  | 37,278        | 2000-2017     | not specified                                                                                                                                                      |
| Shaw (2021) <sup>58</sup>    | Systematic review                   | Recruitment; Reporting | Brain health and prevention trials | 42  | 100,748       | 2004-2020     | USA (42)                                                                                                                                                           |
| Wilder (2016) <sup>59</sup>  | Systematic review                   | Recruitment            | Hepatitis C                        | 314 | Not provided  | 2000-2011     | North America (69)<br>Europe (143)<br>Multinational (102)                                                                                                          |
| Ricardo (2022) <sup>60</sup> | Systematic review                   | Recruitment            | Nail ssoriasis                     | 45  | 12,943        | Not specified | US (22) non-US (23)                                                                                                                                                |

|                                     |                   |                                     |                                                     |     |                    |                  |                                                                                                        |
|-------------------------------------|-------------------|-------------------------------------|-----------------------------------------------------|-----|--------------------|------------------|--------------------------------------------------------------------------------------------------------|
| Rencsok (2020) <sup>61</sup>        | Systematic review | Recruitment; Reporting              | Prostate cancer                                     | 72  | 893,378            | 1987-2016        | US (72)                                                                                                |
| Polo (2019) <sup>62</sup>           | Systematic review | Recruitment; Reporting and analysis | Depression                                          | 342 | 61,283             | 1981-2016        | USA (342)                                                                                              |
| Onuorah (2022) <sup>63</sup>        | Systematic review | Recruitment; Reporting              | Multiple sclerosis                                  | 44  | 42 to 2,244        | 1995-2020        | Brazil, Ireland, South Africa, the United Kingdom, United States.                                      |
| Nalven (2021) <sup>64</sup>         | Systematic review | Recruitment; Reporting              | Opioid pharmacological treatment trials:            | 50  | 9,124              | Up to March 2020 | USA (50)                                                                                               |
| Minocher Homji (2011) <sup>65</sup> | Systematic review |                                     | Cardiovascular disease                              | 45  | 140,764            | 1980-2009        | USA (5)<br>UK (3)<br>Canada (2)<br>Australia (1)                                                       |
| Franzen (2021) <sup>66</sup>        | Systematic review | Reporting                           | Alzheimer’s disease                                 | 101 | Not provided       | 2001-2019        | North America (80), Europe (61%), Asia (37), Oceania (33); South America (15), Africa (7).             |
| Fletcher (2022) <sup>67</sup>       | Systematic review | Reporting                           | BCG-unresponsive non-muscle invasive bladder cancer | 27  | 1.673              | 1998-2021        | US (21)<br>Canada (6)                                                                                  |
| Falasinnu (2018) <sup>68</sup>      | Systematic review | Reporting                           | Systemic lupus erythematosus                        | 193 | Not provided       | 1997-2017        | US (79)<br>Others (114)                                                                                |
| Eichel (2021) <sup>69</sup>         | Systematic review | Reporting                           | Mindfulness research                                | 94  | 3,582 (42/94 RCTs) | Not specified    | US (45)<br>Canada (8)<br>Europe (31)<br>UK (7)<br>Iran (6)<br>Israel (1)<br>China (2)<br>Australia (1) |

|                                      |                                     |           |                                               |      |              |                                           |                                                                                                                                                                              |
|--------------------------------------|-------------------------------------|-----------|-----------------------------------------------|------|--------------|-------------------------------------------|------------------------------------------------------------------------------------------------------------------------------------------------------------------------------|
| Buffenstein (2023) <sup>83</sup>     | Systematic review and meta-analysis | Reporting | Different kinds of diseases                   | 2977 | 607,181      | 2008-2019                                 | US (2977)                                                                                                                                                                    |
| Chopera <sup>70</sup>                | Systematic review                   | Reporting | Chronic obstructive pulmonary disease (COPD)  | 36   | 2996         | from inception to 31 December 2022,       | US (14)<br>UK (8)<br>Australia (9)<br>Canada (5)                                                                                                                             |
| De Jesús-Romero (2024) <sup>71</sup> | Systematic review                   | Reporting | cognitive behavioral therapy (iCBT)           | 62   | 17,210       | 1966-2022                                 | US (17); Germany (12), Australia (10), Sweden (10), Netherlands (6), China (2), Finland (2), UK (2), Canada (1), Colombia (1), Ireland (1), New Zealand (1), Switzerland (1) |
| Delma (2023) <sup>72</sup>           | Systematic review                   | Reporting | upper-extremity                               | 481  | Not provided | 2000-2021                                 | North America (158)<br>Europe (184)<br>Asia (91)<br>Middle East (17)<br>South America (10)<br>Australia (12)<br>Africa (6)<br>Oceania (3)                                    |
| Gala (2023) <sup>73</sup>            | Systematic review                   | Reporting | Obesity                                       | 11   | 2129         | From inception to 2022                    | US (11)                                                                                                                                                                      |
| Maria Guzmán (2023) <sup>74</sup>    | Systematic review                   | Reporting | self-injurious thoughts and behaviors (SITBs) | 525  | Not provided | U.S. (n = 217) and international (n= 308) | 80.8% (n = 424) of RCTs were conducted in high-income countries (e.g., United States, England, Norway, and Australia), while only 6.7% (n=35) were conducted in middle-      |

|                                |                                     |                        |                                                                  |     |              |              |                                                                                                                                                                           |
|--------------------------------|-------------------------------------|------------------------|------------------------------------------------------------------|-----|--------------|--------------|---------------------------------------------------------------------------------------------------------------------------------------------------------------------------|
|                                |                                     |                        |                                                                  |     |              |              | income countries (e.g., India, Brazil, and China)                                                                                                                         |
| Issa (2023) <sup>75</sup>      | Systematic review                   | Reporting and analysis | Spine surgery                                                    | 278 | Not provided | 2012 - 2022  | US (67), China (30), South Korea (17), Japan (N=14) Multiple countries (8) Other (142 from 32 countries)                                                                  |
| Pelton (2024) <sup>84</sup>    | Systematic review and Meta-analysis | Reporting              | Crohn’s disease                                                  | 67  | 20 013       | Not provided | Not provided                                                                                                                                                              |
| Steventon (2024) <sup>76</sup> | Systematic review                   | Reporting              | systemic anti-cancer therapies (SACT) for gynecological cancers, | 26  | 17,041       | 2012-2022    | Of 5,478 research sites, 80.1% were located in North America, 13.0% in Europe, 3.4% in East Asia, 1.3% in the Middle East, 1.3% in South America and 0.8% in Australasia. |
