# Supplementary material
Source: HighWire-hosted journal article supplement (https://bmjopen.bmj.com/content/14/8/e084889)
Supplement: inline-supplementary-material-2 [file inline-supplementary-material-2.pdf]

Additional file 2: Characteristics of ethnicity, recruitment and retention strategies and analysis of ethnic variables

| Author                           | Ethnicity-related variables collected | Ethnic/racial categories                                                                                                                                   | Recruitment strategies | Retention strategies | Analysis of ethnicity/race |
|----------------------------------|---------------------------------------|------------------------------------------------------------------------------------------------------------------------------------------------------------|------------------------|----------------------|----------------------------|
| Zhang (2013)<br><sup>57</sup>    | Race/ethnicity                        | Whites, African-Americans, Hispanics, and Asians                                                                                                           | N/A*                   | N/A                  | N/A                        |
| Vyas (2018)<br><sup>82</sup>     | race/ethnicity                        | Asian, African/Caribbean black, Hispanic/Latino, and other                                                                                                 | N/A                    | N/A                  | Yes                        |
| Tseng (2021)<br><sup>33</sup>    | race/ethnicity                        | White, African American, Hispanic/Latino/a participants, Asian/Pacific Islander/Native Hawaiian participants, American Indian/Native Alaskan participants. | N/A                    | N/A                  | No                         |
| Tahhan (2020)<br><sup>37</sup>   | race and ethnicity                    | Black, Asian, Hispanic, Non-white                                                                                                                          | N/A                    | N/A                  | No                         |
| Somerson (2014)<br><sup>48</sup> | race and ethnicity                    | Hispanic, African-American                                                                                                                                 | N/A                    | N/A                  | No                         |
| Shaw (2021)<br><sup>58</sup>     | race and ethnicity                    | White, Black or African American. American Indian or Alaska Native, Hawaii Native or Pacific Islander                                                      | N/A                    | N/A                  | N/A                        |
| Schick (2020)<br><sup>50</sup>   | race/ethnicity                        | White, Black/African American, Hispanic/Latinx, Asian, American Indian/Alaska Native, Multiracial                                                          | N/A                    | N/A                  | No                         |
| Sayyid (2021)<br><sup>36</sup>   | race                                  | White/Caucasian, Black/African American, Asian, Latin/Hispanic                                                                                             | N/A                    | N/A                  | Yes,                       |

|                                |                    |                                                                                                                                                                  |                                                                                                                                                |                                                                                                                                                                                                                       |     |
|--------------------------------|--------------------|------------------------------------------------------------------------------------------------------------------------------------------------------------------|------------------------------------------------------------------------------------------------------------------------------------------------|-----------------------------------------------------------------------------------------------------------------------------------------------------------------------------------------------------------------------|-----|
| Wilder (2016) <sup>59</sup>    | race               | African American, White                                                                                                                                          | N/A                                                                                                                                            | N/A                                                                                                                                                                                                                   | No  |
| Rosenbaum (2017) <sup>47</sup> | race, ethnicity    | White, African-American/Black, Asian American, American Indian/Alaska Native, Hispanic (7.7%), Other racial minorities .                                         | Technology (e.g. smartphones)                                                                                                                  | N/A                                                                                                                                                                                                                   | N/A |
| Ricardo (2022) <sup>60</sup>   | race, ethnicity    | White, Asian, black/African American, American Indian/Alaska Native, and Native Hawaiian/Other Pacific Islander, Asian, Hispanic or Latino. Multiracial          | N/A                                                                                                                                            | N/A                                                                                                                                                                                                                   | N/A |
| Rencsok (2020) <sup>61</sup>   | race, ethnicity    | White, Black/African American, American Indian, Alaska Native, Pacific Islander, Hispanic, Latino                                                                | N/A                                                                                                                                            | N/A                                                                                                                                                                                                                   | No  |
| Polo (2019) <sup>62</sup>      | race, ethnicity,   | European American, African American, Latino, Asian America, Native American, Native Hawaiians/Pacific Islanders or Native Americans/Native Alaskans, multiracial | N/A                                                                                                                                            | N/A                                                                                                                                                                                                                   | N/A |
| Paul (2021) <sup>27</sup>      | race, ethnicity    | White/Caucasian, Black/African American, Asian Hispanic                                                                                                          | N/A                                                                                                                                            | N/A                                                                                                                                                                                                                   | Yes |
| Onuorah (2022) <sup>63</sup>   | race/ethnicity     | White, Black, Asian, and, in one case, Native American/Alaskan Native, Hispanic                                                                                  | N/A                                                                                                                                            | N/A                                                                                                                                                                                                                   | Yes |
| Nicholson (2015) <sup>39</sup> | ethnicity          | African Americans/Blacks<br>Latinos/Latinas/Hispanics, Native Americans, Multiethnic Minorities                                                                  | Face-to-face interaction, research staff training, incentives, Cultural targeting; Community engagement community-based participatory research | Incentives, personal approach, utilizing a dedicated phone line, project identity and logos, participant convenience, repeated contact with participants, volunteers from the community as community health advisors. | N/A |
| Nalven (2021) <sup>64</sup>    | race and ethnicity | White, Black, Hispanic/Latinx, American Indian/Alaska Native, Asian, Native                                                                                      | N/A                                                                                                                                            | N/A                                                                                                                                                                                                                   | Yes |

|                                  |                                   |                                                                                                                                                    |                                                                                                                                                                                                                                                                                                                          |                                                                                                                                                                                                                                                                       |               |
|----------------------------------|-----------------------------------|----------------------------------------------------------------------------------------------------------------------------------------------------|--------------------------------------------------------------------------------------------------------------------------------------------------------------------------------------------------------------------------------------------------------------------------------------------------------------------------|-----------------------------------------------------------------------------------------------------------------------------------------------------------------------------------------------------------------------------------------------------------------------|---------------|
|                                  |                                   | Hawaiian/Other Pacific Islander, multiracial                                                                                                       |                                                                                                                                                                                                                                                                                                                          |                                                                                                                                                                                                                                                                       |               |
| Mendoza (2012) <sup>38</sup>     | ethnicity, race                   | European American/non-Hispanic White, African American/Black, Hispanic, Asian American, and another ethnicity.                                     | medical referral, Advertisements                                                                                                                                                                                                                                                                                         | N/A                                                                                                                                                                                                                                                                   | No            |
| Masood (2019) <sup>44</sup>      | Ethnicity                         | Ethnic minority populations                                                                                                                        | Engagement with community and family; Working with religious leaders; Collaborating with ethnic community organisations; Self referrals and assistance from family and carers; Ethnic matching, Linguistic matching, language interpretation, Follow-up arrangements, home recruitment visits, telephone follow-up calls | The main recruitment strategies used in trials were recruitment from ethnically diverse areas; recruitment from community/religious organisation; ethnic matching at sites; interviews conducted in preferred language; telephone follow-up and interpreting service. | Yes           |
| Kwiatkowski (2013) <sup>49</sup> | race/ethnicity                    | White, African American, Asian, Hispanic, Native American, and Other.                                                                              | N/A                                                                                                                                                                                                                                                                                                                      | N/A                                                                                                                                                                                                                                                                   | Not specified |
| Kong (2021) <sup>56</sup>        | race, ethnicity                   | Race as White, Black/African American, Asian, American Indian/Alaskan, and Native Hawaiian/Pacific Islander. Ethnicity as Hispanic or non-Hispanic | N/A                                                                                                                                                                                                                                                                                                                      | N/A                                                                                                                                                                                                                                                                   | No            |
| Isaacs (2016) <sup>55</sup>      | ethnic minority, English language | Spanish, Cantonese<br>Of the studies that included language                                                                                        | N/A                                                                                                                                                                                                                                                                                                                      | N/A                                                                                                                                                                                                                                                                   | Yes           |

|                             |                           |                                                                                                         |                                                                                                                                                                                                                                           |     |     |
|-----------------------------|---------------------------|---------------------------------------------------------------------------------------------------------|-------------------------------------------------------------------------------------------------------------------------------------------------------------------------------------------------------------------------------------------|-----|-----|
|                             |                           | proficiency as an eligibility criterion, there was little consistency in the way that this was defined. |                                                                                                                                                                                                                                           |     |     |
| Ibrahim (2013)<br>41        | ethnic or cultural groups | African American, Middle Eastern, Chinese, Latino, Hispanic                                             | Direct face to face interactions of research personnel with potential participants, presentations<br><br>Collaboration with community leaders; referrals by healthcare professionals; snowballing; printed material; and broadcast media. | N/A | No  |
| Minocher Homji (2011)<br>65 | Ethnicity                 | Asian, White or Black/African American, Pacific Islander, First Nations status                          | N/A                                                                                                                                                                                                                                       | N/A | N/A |
| Heller (2014)<br>43         | Race, ethnicity           | African Americans; Hispanic/Latinos, Racial/ethnic minority women,                                      | Engagement of providers, hospitals, and/or participants in the underserved communities.<br><br>Engagement of community members                                                                                                            | N/A | N/A |
| Haughton (2018)<br>42       | race/ethnicity            | White participants, African American, Latinos, Asian, Native American, Hispanic                         | community engagement, community based participatory research, research partnerships, peer to peer sampling; the use of technology                                                                                                         | N/A | N/A |
| Griffin (2021)<br>54        | race, ethnicity           | White, African American/black, Asian/Pacific Islander, Native American, or other/unknown race.          | N/A                                                                                                                                                                                                                                       | N/A | N/A |
| Glover (2015)<br>25         | Indigenous people         | N/A                                                                                                     | Common factors that were seen as facilitators included partnership and                                                                                                                                                                    | N/A | N/A |

|                                |                    |                                                     |                                                                                                                                                                                                                                                                                                                                                                                                                                                                      |     |     |
|--------------------------------|--------------------|-----------------------------------------------------|----------------------------------------------------------------------------------------------------------------------------------------------------------------------------------------------------------------------------------------------------------------------------------------------------------------------------------------------------------------------------------------------------------------------------------------------------------------------|-----|-----|
|                                |                    |                                                     | relationship building (n = 25), culturally appropriate study design (n = 23), employing Indigenous staff (n = 20), targeted recruitment techniques (n = 21), and appropriate study materials (n = 20) (                                                                                                                                                                                                                                                              |     |     |
| Franzen (2021) <sup>66</sup>   | race and ethnicity | Whites, Asian, Black/African American, Latino       | N/A                                                                                                                                                                                                                                                                                                                                                                                                                                                                  | N/A | N/A |
| Fletcher (2022) <sup>67</sup>  | Race and ethnicity | White, Black, Hispanic, Asian, and Other            | One recent qualitative study conducted interviews with research staff at five U.S. cancer centers about perceived impediments to minority recruitment in clinical trials. A common theme that emerged was the need for improved training of research personnel at all levels (from study recruiters to principal investigators) on cultural awareness, patient-centered communication for varying levels of health literacy, and trust-building community engagement | N/A | N/A |
| Falasinnu (2018) <sup>68</sup> | Race and ethnicity | Whites, Blacks, Hispanics, Asians, Native Americans | N/A                                                                                                                                                                                                                                                                                                                                                                                                                                                                  | N/A | N/A |

|                              |                    |                                                                                                                                   |                                                                                                 |                                                                                                                                                                                                                                                                                                                                                                                                                                                                                                                                                                                                                                                           |     |
|------------------------------|--------------------|-----------------------------------------------------------------------------------------------------------------------------------|-------------------------------------------------------------------------------------------------|-----------------------------------------------------------------------------------------------------------------------------------------------------------------------------------------------------------------------------------------------------------------------------------------------------------------------------------------------------------------------------------------------------------------------------------------------------------------------------------------------------------------------------------------------------------------------------------------------------------------------------------------------------------|-----|
| Eichel (2021) <sup>69</sup>  | race and ethnicity | White/European, Black/African American, Asian, Native/Aboriginal, Multiracial, Native Hawaiian/ Pacific Islander, Hispanic/Latinx | N/A                                                                                             | N/A                                                                                                                                                                                                                                                                                                                                                                                                                                                                                                                                                                                                                                                       | N/A |
| Cwalina (2022) <sup>29</sup> | race and ethnicity | White, Black, Hispanic, Asian, and other.                                                                                         | N/A                                                                                             | N/A                                                                                                                                                                                                                                                                                                                                                                                                                                                                                                                                                                                                                                                       | N/A |
| Cui (2015) <sup>45</sup>     | race and ethnicity | race and ethnicity - Hispanic, White, Asian, Black, other                                                                         | Presentations, flyers, brochures, posters, media advertisements, phone calls, and word-of-mouth | Culturally appropriate intervention activities<br><br>incentive - grocery gift cards, gifts, cash, food, recipe books, and exercise equipment, building staff- participant relationships, and regular communication with participants, such as thank-you notes, postcards, or project newsletters<br><br>bond,<br><br>participant convenience – e.g., transportation support to and from intervention activities or data collection, make-up sessions for missed intervention sessions, upcoming event reminders, childcare services, and optional days or home visits for data collection<br><br>Participant tracking - home visits for data collection. | N/A |
| Chen (2022) <sup>51</sup>    | race and ethnicity | race and ethnicity - White, non-white                                                                                             | N/A                                                                                             | N/A                                                                                                                                                                                                                                                                                                                                                                                                                                                                                                                                                                                                                                                       | N/A |
| Charrow (2017) <sup>9</sup>  | Race and ethnicity | White, Hispanic, Asian, African American                                                                                          | N/A                                                                                             | N/A                                                                                                                                                                                                                                                                                                                                                                                                                                                                                                                                                                                                                                                       | N/A |
| Carroll (2011) <sup>40</sup> | ethnicity          | African American, Hispanic, Asian                                                                                                 | Targeted advertisements, targeted mailings and/or telephone calls via use of phone lists from   | Retention methods were described by 28 of the 38 studies; multiple contacts with participants during the study period; providing financial or other                                                                                                                                                                                                                                                                                                                                                                                                                                                                                                       | N/A |

|                                |                                  |                                                                        |                                                                                                                                                                                                                                                                                                                                                                                     |                                                                                                                                                                                                                                                                                                                                                                                                                                                                |     |
|--------------------------------|----------------------------------|------------------------------------------------------------------------|-------------------------------------------------------------------------------------------------------------------------------------------------------------------------------------------------------------------------------------------------------------------------------------------------------------------------------------------------------------------------------------|----------------------------------------------------------------------------------------------------------------------------------------------------------------------------------------------------------------------------------------------------------------------------------------------------------------------------------------------------------------------------------------------------------------------------------------------------------------|-----|
|                                |                                  |                                                                        | <p>organizations, direct neighborhood linking recruitment to a cultural tradition, carefully planning culturally tailored, interactive pre-intervention/informational sessions</p> <p>Research team members ethnically and/or linguistically matched to the study population collaboratively working with the partnering community organization and/or community advisory board</p> | <p>incentives, transportation, or child care were also commonly mentioned;</p> <p>Caring attitude towards participants, demonstrate cultural sensitivity and respect for participants' life situations, meet regularly with community advisors and study staff for problem solving and be flexible or accommodating to location and timing of study visits as much as possible; having bicultural, bilingual, and/or ethnically matched study team members</p> |     |
| Canevelli (2019) <sup>28</sup> | race                             | White, Asian, Blacks, Hispanics -                                      | N/A                                                                                                                                                                                                                                                                                                                                                                                 | N/A                                                                                                                                                                                                                                                                                                                                                                                                                                                            | N/A |
| Burnette (2022) <sup>46</sup>  | race/ethnicity;                  | White, Asian, Hispanic, African American, Caucasian, Hispanic American | <p>Clinical referrals and advertisements were the most common recruitment methods cited, but further details were rarely available.</p> <p>Providing sufficient detail about recruitment is not only important for reproducibility but also to enhance understanding of how recruitment affects reach and inclusion.</p>                                                            | N/A                                                                                                                                                                                                                                                                                                                                                                                                                                                            | N/A |
| Begic (2019) <sup>52</sup>     | race/ethnicity, country of birth | White/Caucasian                                                        | N/A                                                                                                                                                                                                                                                                                                                                                                                 | N/A                                                                                                                                                                                                                                                                                                                                                                                                                                                            | N/A |

|                                      |                    |                                                                                                                                                                  |     |     |     |
|--------------------------------------|--------------------|------------------------------------------------------------------------------------------------------------------------------------------------------------------|-----|-----|-----|
| Acton (2022)<br><sup>77</sup>        | Race and ethnicity | White, Black, Asian, Hispanic                                                                                                                                    | N/A | N/A | N/A |
| Hirano (2021)<br><sup>53</sup>       | race and ethnicity | Black, Asian, Hispanic, White, Black, Asian, Hispanic                                                                                                            | N/A | N/A | N/A |
| Orkin (2021) <sup>26</sup>           | race/ethnicity     | not specified                                                                                                                                                    | N/A | N/A | N/A |
| Riccioni (2023) <sup>79</sup>        | Race/ethnicity     | Predominantly Whites. Only 11 RCTs reported the percentage for each racial group (American and Pacific Islanders, Asian, Black, Hispanic, and White individuals) | N/A | N/A | N/A |
| Alvarez (2024)<br><sup>80</sup>      | race and ethnicity | Whites, Black or African Americans, Asians, American Indians, and Pacific Islanders.                                                                             | N/A | N/A | N/A |
| Buffenstein (2023) <sup>83</sup>     | race and ethnicity | Hispanics, American Indians and Alaskan Natives, Asians, Whites, Native Hawaiians, Pacific Islanders, (Blacks and multiracial participants                       | N/A | N/A | N/A |
| De Jesús-Romero (2024) <sup>71</sup> | Race, ethnicity    | White, Asian, Black                                                                                                                                              | N/A | N/A | N/A |
| Delma (2023)<br><sup>72</sup>        | Race, ethnicity    | White, Black, Asian, Hispanic/Latino, Hawaiian/Pacific Islander, American Indian                                                                                 | N/A | N/A | N/A |
| Gala (2023) <sup>73</sup>            | Race, ethnicity    | White, Black, Hispanic, Other                                                                                                                                    | N/A | N/A | N/A |
| Maria Guzmán (2023) <sup>74</sup>    | Race, ethnicity    | White, Black, Asian, American/Pacific, Islander, American Indian/Alaska Native                                                                                   | N/A | N/A | N/A |
| Issa (2023) <sup>75</sup>            | Race, ethnicity    | White, Black or African American, American Indian or Alaska Native was reported twice, and Native Hawaiian or other Pacific Islander                             | N/A | N/A | No  |



|                                   |                 |                                                                                                                                                       |     |     |     |
|-----------------------------------|-----------------|-------------------------------------------------------------------------------------------------------------------------------------------------------|-----|-----|-----|
| Kotlier (2024)<br><sup>30</sup>   | Race, ethnicity | Not specified                                                                                                                                         | N/A | N/A | N/A |
| Kou (2024)<br><sup>34</sup>       | Race/ethnicity  | Not specified – across different countries and cultures                                                                                               | N/A | N/A | N/A |
| Long (2024)<br><sup>81</sup>      | Race/ethnicity  | White, Asian Black, Hispanic, other, and American Indian/Alaska Native or Native Hawaiian/Pacific Islander.                                           | N/A | N/A | Yes |
| Pathiyil (2023)<br><sup>31</sup>  | Race, ethnicity | White, Asian, Black, and Pacific Islander.                                                                                                            | N/A | N/A | N/A |
| Patki (2023)<br><sup>32</sup>     | Race, ethnicity | White, Asian and Black                                                                                                                                | N/A | N/A | N/A |
| Pelton (2024)<br><sup>84</sup>    | Race, ethnicity | White, Black, Asian, Hispanic/Latino                                                                                                                  | N/A | N/A | N/A |
| Riaz (2023)<br><sup>85</sup>      | Race, ethnicity | White, Black, Hispanic, American Indian/Alaska Native, Asian/Pacific Islander                                                                         | N/A | N/A | Yes |
| Steventon (2024)<br><sup>76</sup> | Race, ethnicity | Caucasian, East Asian, Black/African American, Hispanic or Latino, American Indian or Alaska Native, Native Hawaiian or Pacific Islander and Hispanic | N/A | N/A | N/A |
| Xiao (2024)<br><sup>78</sup>      | Race, ethnicity | Hispanic, Latino, Black, Asian, Native Hawaiian or Other Pacific Islander, American Indian or Alaska Native                                           | N/A | N/A | N/A |
| Talaski (2024)<br><sup>35</sup>   | Race            | Not specified                                                                                                                                         | N/A | N/A | N/A |

\*N/A = not applicable
